# Supplementary material
Source: Springer Nature journal article supplement (https://www.springermedizin.de/resource/supplementary/12911_2006_132_MOESM1_ESM.pdf/9527210)
Supplement: MOESM1 [file 9527210]

### Estimating number of words per query in queries submitted to NLM's PubMed.

We took one day worth of all queries submitted to NLM's PubMed [taken from <ftp://ftp.ncbi.nih.gov/toolbox/pubmed/query-logs/> as of June 2006]. There were 2,995,234 queries. Then we wrote a computer script to go through each query and split it into words. The split function used white-space as the delimiter to separate the words. The script also detected presence and count of Boolean operators AND and OR in each query. Finally it computed count of (non-operator) words in each query. This table shows percentage of queries with different word counts.

| number of words in query | percentage of total submitted queries |
|--------------------------|---------------------------------------|
| 0                        | 2.60                                  |
| 1                        | 14.51                                 |
| 2                        | 37.67                                 |
| 3                        | 21.01                                 |
| 4                        | 11.65                                 |
| 5                        | 5.09                                  |
| 6                        | 2.66                                  |
| 7                        | 1.31                                  |
| 8                        | 0.83                                  |
| 9                        | 0.57                                  |
| 10+                      | 2.08                                  |

Apparently there are times when a user clicks the submit button without typing any words in the search box (we checked and this figure is not a computational error of the script).

There are 14.5% single-word queries. The rest of the queries (82.9%), the majority of them, are multi-word queries.

We note that within multi-word queries, there are queries where the whole query maps to a single MeSH term. For example, query 'two dimensional gel electrophoresis' maps to "electrophoresis, gel, two-dimensional"[MeSH Terms]. In such cases many of the retrieved articles can be relevant. However, this is not a common case. For the majority of multi-word queries, ascertaining presence of relation between the words in an article will improve the relevance score.
